# Supplementary material
Source: PubMed Central journal article supplement (PMC2710821)

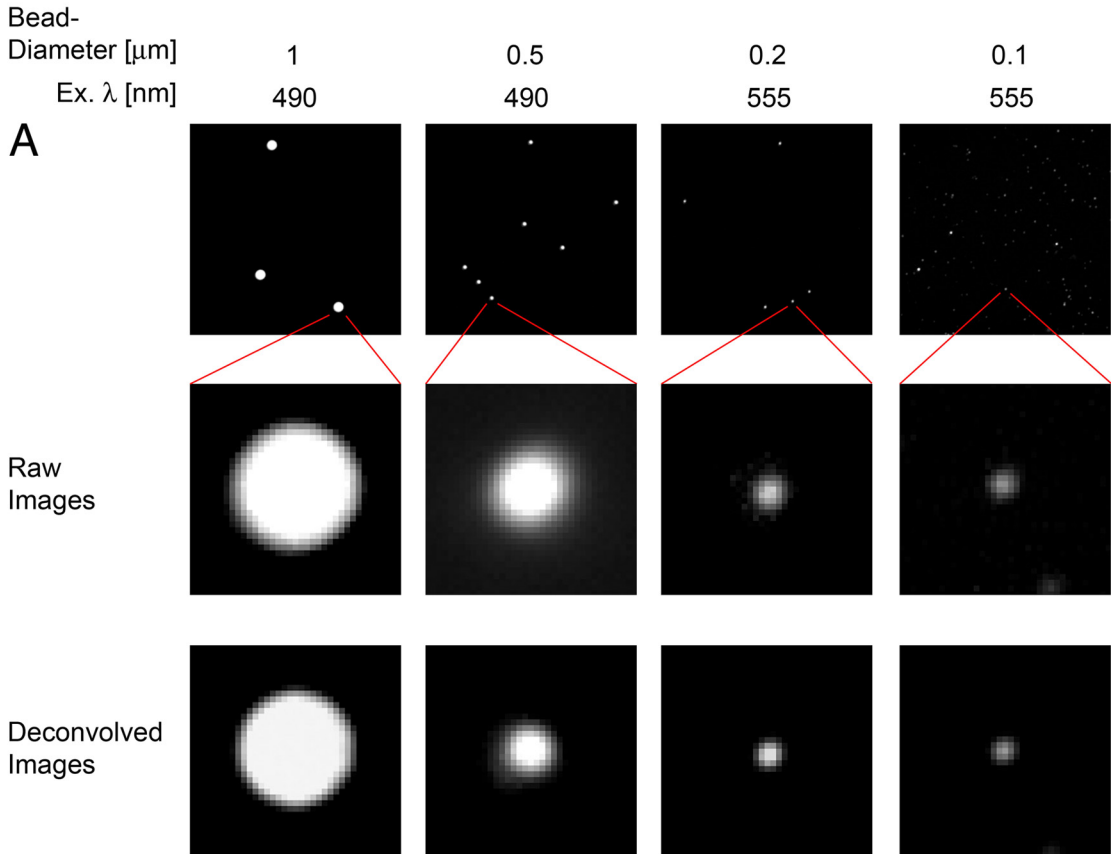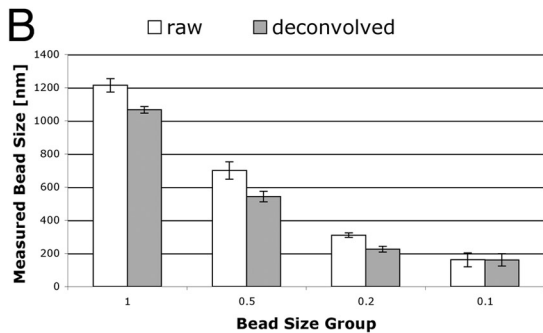

**C**

| Bead Diameter [ $\mu\text{m}$ ]        | 1          | 0.5        | 0.2        | 0.1        |
|----------------------------------------|------------|------------|------------|------------|
| App. Mean Diameter Raw Image [nm]      | 1213.6     | 700        | 310        | 161.3      |
| SEM Raw Image                          | $\pm 40.9$ | $\pm 52.7$ | $\pm 13.7$ | $\pm 42.5$ |
| # of Beads Measured                    | 11         | 10         | 5          | 20         |
| App. Mean Diam. Deconvolved Image [nm] | 1065.9     | 542.9      | 225        | 160.9      |
| SEM Deconvolved Image                  | $\pm 20.2$ | $\pm 31.3$ | $\pm 17.7$ | $\pm 37.5$ |
| # of Beads Measured                    | 11         | 7          | 5          | 48         |

### Pre-Conversion

Green Channel

Red Channel

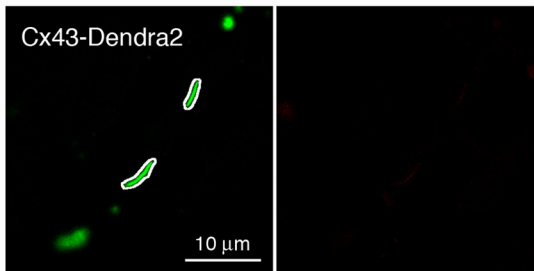

### Post-Conversion

Green Channel

Red Channel

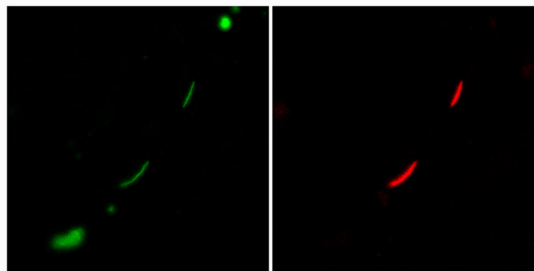

### Red-Channel z-scann

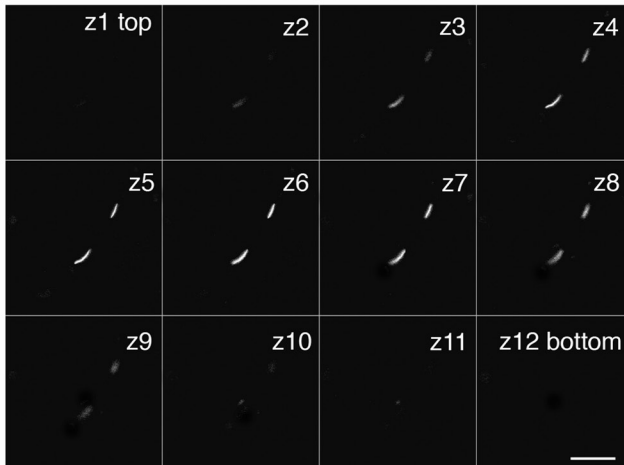

### Red Channel 3D-Volume Recon.

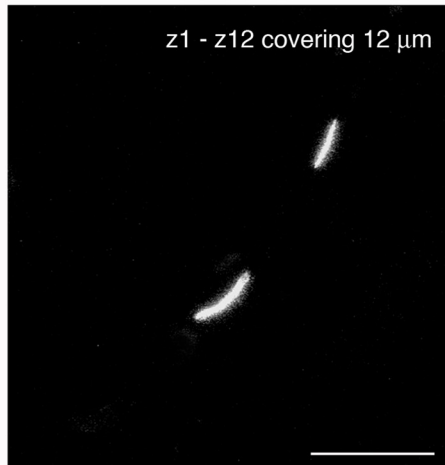

### Red-Channel Time-Lapse, 2 sec intervals, 100 frames

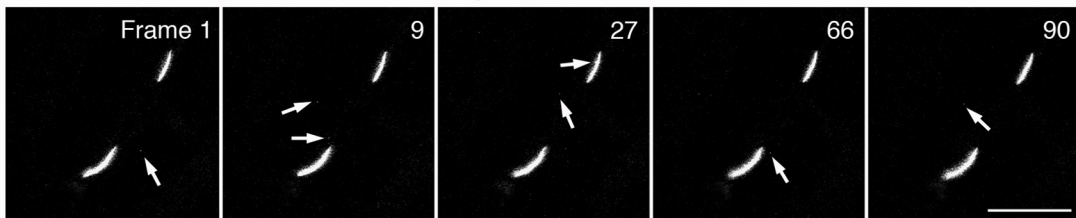

Supplement: E09-04-0288_1.pdf [file E09-04-0288_1.pdf]
